# Supplementary material for: Prognostic impact of mineralocorticoid receptor antagonist in patients with heart failure with preserved ejection fraction
Source: PubMed Central journal article supplement — ESC Heart Fail. 2020 Jun 27;7(5):2752–61. doi: 10.1002/ehf2.12867 (PMC7524222; doi:10.1002/ehf2.12867), 2020-06-27
Supplement: EHF2-7-2752-s001.pdf [file EHF2-7-2752-s001.pdf]

**A** **Cardiovascular Death and HF readmission**

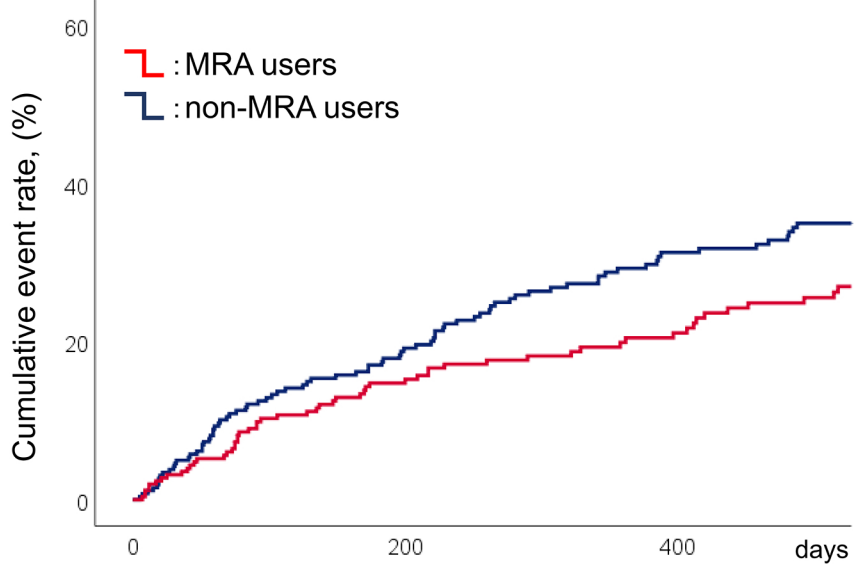

| Follow-up (day) |             | 0   | 200 | 400 | 500 |
|-----------------|-------------|-----|-----|-----|-----|
| MRA users       | No. at risk | 255 | 180 | 126 | 109 |
| Non-MRA users   | No. at risk | 263 | 188 | 136 | 120 |

Log Rank : p=0.037

**B** **Cardiovascular Death**

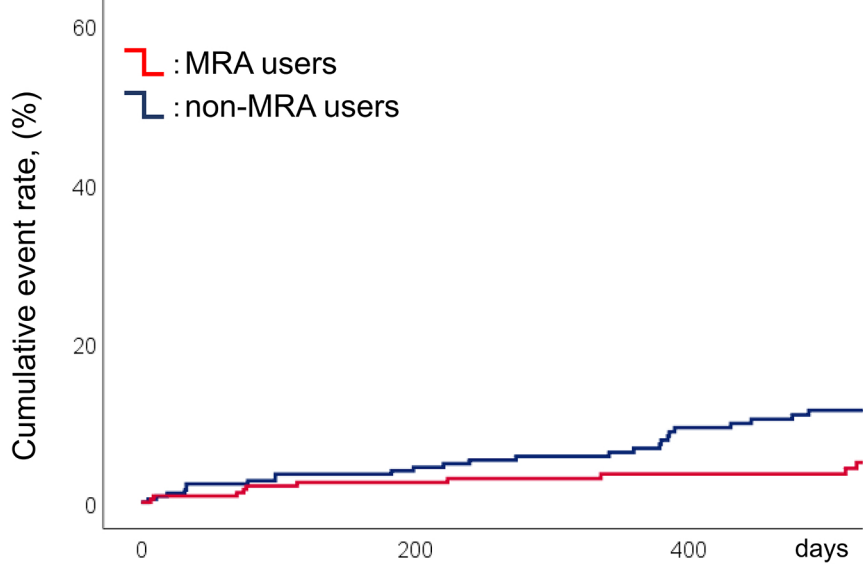

| Follow-up (day) |             | 0   | 200 | 400 | 500 |
|-----------------|-------------|-----|-----|-----|-----|
| MRA users       | No. at risk | 255 | 204 | 153 | 136 |
| Non-MRA users   | No. at risk | 263 | 218 | 173 | 156 |

Log Rank : p=0.122

**C** **HF readmission**

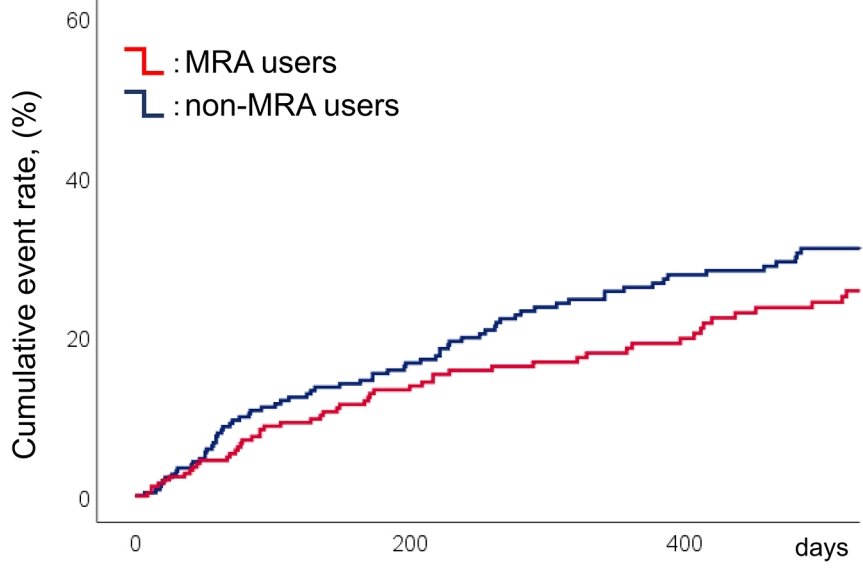

| Follow-up (day) |             | 0   | 200 | 400 | 500 |
|-----------------|-------------|-----|-----|-----|-----|
| MRA users       | No. at risk | 255 | 180 | 126 | 109 |
| Non-MRA users   | No. at risk | 263 | 188 | 137 | 121 |

Log Rank : p=0.180
