# Supplementary material for: Prognostic impact of mineralocorticoid receptor antagonist in patients with heart failure with preserved ejection fraction
Source: PubMed Central journal article supplement — ESC Heart Fail. 2020 Jun 27;7(5):2752–61. doi: 10.1002/ehf2.12867 (PMC7524222; doi:10.1002/ehf2.12867), 2020-06-27
Supplement: EHF2-7-2752-s002.pdf [file EHF2-7-2752-s002.pdf]

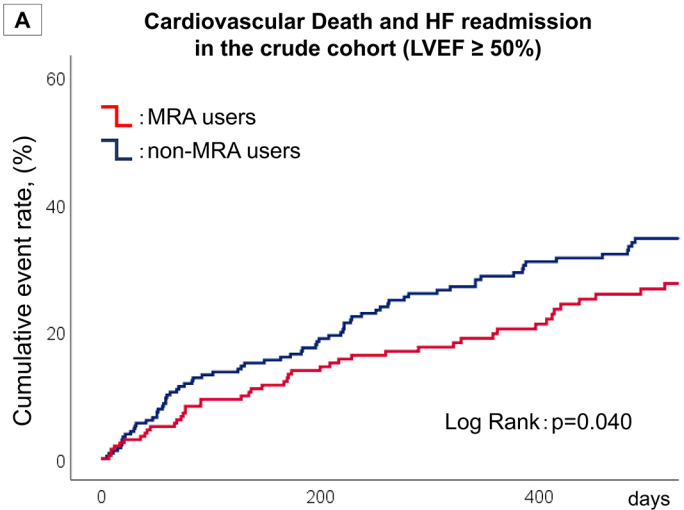

| Follow-up (day) |             | 0   | 200 | 400 | 500 |
|-----------------|-------------|-----|-----|-----|-----|
| MRA users       | No. at risk | 201 | 144 | 101 | 87  |
| Non-MRA users   | No. at risk | 234 | 167 | 120 | 105 |

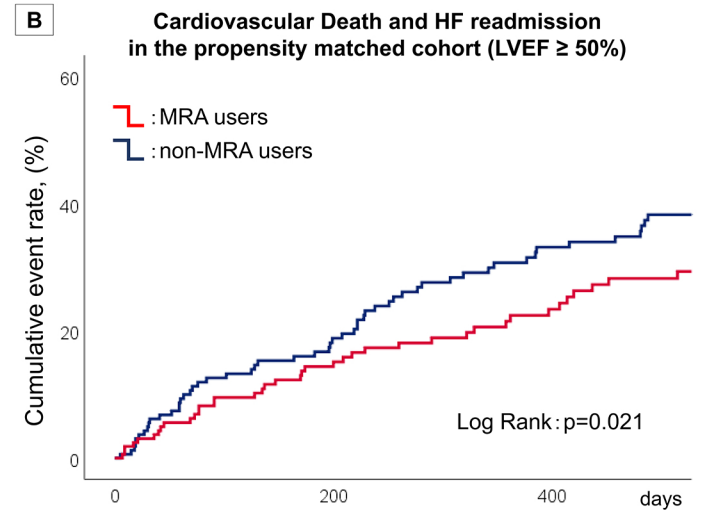

| Follow-up (day) |             | 0   | 200 | 400 | 500 |
|-----------------|-------------|-----|-----|-----|-----|
| MRA users       | No. at risk | 164 | 117 | 79  | 68  |
| Non-MRA users   | No. at risk | 164 | 114 | 82  | 72  |
